# Supplementary material for: Overexpression of BoNAC019, a NAC transcription factor from Brassica oleracea, negatively regulates the dehydration response and anthocyanin biosynthesis in Arabidopsis
Source: PubMed Central journal article supplement (PMC6127341; doi:10.1038/s41598-018-31690-1), 2018-09-06
Supplement: 41598_2018_31690_MOESM1_ESM.pdf [file 41598_2018_31690_MOESM1_ESM.pdf]

**Overexpression of *BoNAC019*, a NAC transcription factor from  
*Brassica oleracea*, negatively regulates the dehydration response and  
anthocyanin biosynthesis in *Arabidopsis***

Jinfang Wang<sup>1#</sup>, Weiran Lian<sup>1#</sup>, Yunyun Cao<sup>1#</sup>, Xiaoyun Wang<sup>1</sup>, Gongle Wang<sup>1</sup>,  
Chuandong Qi<sup>1</sup>, Lun Liu<sup>1</sup>, Sijia Qin<sup>1</sup>, Xiaowei Yuan<sup>2</sup>, Xingsheng Li<sup>2</sup>,  
Shuxin Ren<sup>3</sup> and Yang-Dong Guo<sup>1\*</sup>

<sup>1</sup> *College of Horticulture, Beijing Key Laboratory of Growth and Developmental Regulation  
for Protected Vegetable Crops, China Agricultural University, Beijing, 100193, China*

<sup>2</sup> *Shandong Huasheng Agriculture Co., Ltd, Shandong, China,*

<sup>3</sup> *School of Agriculture, Virginia State University, PO Box 9061, Petersburg, VA 23806, USA*

Corresponding author: Yang-Dong Guo, College of Horticulture,  
China Agricultural University, 2<sup>#</sup>, Yuanmingyuan West Rd, Beijing 100193, China.

Tel: (86-10)-62734845;

Fax: (86-10)-62733404;

E-mail: yaguo@cau.edu.cn

Table S1. List of primers used in this study.

| Purpose                         | Gene                                                                                                                                                                                                                                                                                                                                                                                                                                                          | Primer                                                                                                                                                                                                                                                                                                                                                                                                                                                                                                                                                                                                                                                                                                          |
|---------------------------------|---------------------------------------------------------------------------------------------------------------------------------------------------------------------------------------------------------------------------------------------------------------------------------------------------------------------------------------------------------------------------------------------------------------------------------------------------------------|-----------------------------------------------------------------------------------------------------------------------------------------------------------------------------------------------------------------------------------------------------------------------------------------------------------------------------------------------------------------------------------------------------------------------------------------------------------------------------------------------------------------------------------------------------------------------------------------------------------------------------------------------------------------------------------------------------------------|
| ORF of NAC gene                 | <i>BoNAC019</i><br><i>BoI039157</i>                                                                                                                                                                                                                                                                                                                                                                                                                           | F: ATGGGTATCCAAGAAACCGA<br>R: TCATATATAACCAAACCCACCA                                                                                                                                                                                                                                                                                                                                                                                                                                                                                                                                                                                                                                                            |
| QPCR of CsNAC gene              | <i>BoNAC019</i><br><i>BoActin</i>                                                                                                                                                                                                                                                                                                                                                                                                                             | F: GGTTC AACGGTTTAGCGGACA<br>R: CCCACCAACTTGCCCTGAATA<br>F: TAACAGGGAGAAGATGACTCAGATCA<br>R: AAGATCAAGACGAAGGATAGCATGAG                                                                                                                                                                                                                                                                                                                                                                                                                                                                                                                                                                                         |
| OE construct                    | <i>BoNAC019</i>                                                                                                                                                                                                                                                                                                                                                                                                                                               | F: ggactctagaggatccccggg ATGGGTATCCAAGAAACCGA<br>R: ataagggactgaccaccggg TCATATATAACCAAACCCACCA                                                                                                                                                                                                                                                                                                                                                                                                                                                                                                                                                                                                                 |
| Subcellular location construct  | <i>BoNAC019</i>                                                                                                                                                                                                                                                                                                                                                                                                                                               | F: accatgtagatctgactagt ATGGGTATCCAAGAAACCGA<br>R: aagtctctcttactagtTATATAACCAAACCCACCA                                                                                                                                                                                                                                                                                                                                                                                                                                                                                                                                                                                                                         |
| Transactivation assay           | <i>BoNAC019</i><br><i>BoNAC019-N</i><br><i>BoNAC019-C</i>                                                                                                                                                                                                                                                                                                                                                                                                     | F: GGAATTCC ATGGGTATCCAAGAAACCGA<br>R: GAAGATCTTC TCATATATAACCAAACCCACCA<br>F: GGAATTCC ATGGGTATCCAAGAAAC<br>R: GAAGATCTTC CCGTTTGCACGAGAGGG<br>F: GGAATTCC AAGCTCTAAGTTAGATG<br>R: GAAGATCTTC TCATATATAACCAAACCC                                                                                                                                                                                                                                                                                                                                                                                                                                                                                               |
| QPCR of stress-responsive genes | <i>AtRD29A</i><br><i>AT5G52310</i><br><i>AtRAB18</i><br><i>AT5G66400</i><br><i>AtDREB2A</i><br><i>AT5G05410</i><br><i>AtDREB2B</i><br><i>AT3G11020</i><br><i>AtP5CS1</i><br><i>AT2G39800</i><br><i>AtABI3</i><br><i>AT3G24650</i><br><i>AtABI4</i><br><i>AT2G40220</i><br><i>AtABI5</i><br><i>AT2G36270</i><br><i>AtNCED3</i><br><i>AT3G14440</i><br><i>AtSOD</i><br><i>AT1G08830</i><br><i>AtPOD</i><br><i>AT1G14540</i><br><i>AtCAT</i><br><i>AT1G20630</i> | F: TCTTGATGGTCAACGGAAGGTC<br>R: CCGTACTCCTCCAGTTTCTTC<br>F: GGGAGGAGGAAGAAGGGAATA<br>R: CGTAGCCACCAGCATCATATC<br>F: ATTGTCTGGAGAATGGTGCGG<br>R: GATAGCGAATCCTGCTGTTGT<br>F: AACCGAAGCAGGAAGAAGAGG<br>R: TTTTGGTCTTGGCTCTGATGG<br>F: TGTGTGTTTGTGTATTTGGTTGAGAC<br>R: TGAGTACTAAGCAGAGAGGAAACAAAA<br>F: TGGAGACGCTGATGATACTGT<br>R: AGGAGACGATTGCGTTGACAG<br>F: GCGGTTAGGGCAGGAACAAGG<br>R: AATCCCAAATACTCCCCAAT<br>F: AAGAGAGGGATAGCGAACGAG<br>R: CTAACCACACCAGCCTTCACC<br>F: CAATCATCAA ACTCTCCCGCC<br>R: TCTCGTGGCTGACAAGGAAAC<br>F: ATCTCCTCCCTGCTTTC AACAAC<br>R: CCCAGACATCAATGGTAAGCAAT<br>F: CGGCAAGAGGATTTGAAGTTA<br>R: TGTCTGCGATAGCCCTAAACG<br>F: TCACTTGTGCTGACTTTCTCCGA<br>R: TCTTGATGTGAGATTTGGGTT |

|                  |                               |
|------------------|-------------------------------|
| <i>AtPAL1</i>    | F: GAGGAGTGGACGCTATGTTATGC    |
| <i>AT2G37040</i> | R: CACCATAACTATCAGTGCCTTTG    |
| <i>AtCHS</i>     | F: CTTCCCTCAAATGTCCGTCTATG    |
| <i>AT5G13930</i> | R: CGTGTCTCGTTGTCTGCTCT       |
| <i>AtCHI</i>     | F: CCTTTTCGTCCTTGTTCCTTCATCAT |
| <i>AT3G55120</i> | R: GAGGCGGTTCTGGAATCTATCA     |
| <i>AtC4H</i>     | F: ATCTCAACCACCGTAATCTCGTC    |
| <i>AT2G30490</i> | R: TTCCTCCAATGCTCGCCGTAAAC    |
| <i>AtF3H</i>     | F: TGGGTGAAAGTGACGGAGGAGTA    |
| <i>AT3G51240</i> | R: GTAATGGTTCCAGGGTCAGTGTG    |
| <i>AtF3'H</i>    | F: GACACCGATGGAGACTGTTGAGA    |
| <i>AT5G07990</i> | R: AGCGACGCCTTGTAATCTAACC     |
| <i>AtDFR</i>     | F: AGGCGGCATAGACGTTGTGA       |
| <i>AT5G42800</i> | R: GGAGAAAGCAGCGTGGGATT       |
| <i>AtANS</i>     | F: CTTTTCTACGAGGGCAAATGGGT    |
| <i>AT4G22880</i> | R: CACAGCCAAGAAATCCTAACCT     |
| <i>AtUF3GT</i>   | F: TCCACACCATCTCTATCCCTCAG    |
| <i>AT5G54060</i> | R: AGAAGGGACAAGAGACAGTGCGA    |
| <i>AtTT2</i>     | F: GATGGATCAAGGTGGATCTTCG     |
| <i>AT5G35550</i> | R: AAGTGAAGTCTCGGAGCCAATC     |
| <i>AtMYB113</i>  | F: ATCTTGTTCTTCGCCTTCATAAA    |
| <i>AT1G66370</i> | R: TCGTTCATCGTGCTTCTTACTCA    |
| <i>AtMYB114</i>  | F: AAGTATGGAGAAGGCAAATGGCA    |
| <i>AT1G66380</i> | R: GTAGTTCTTGACATCATTAGCGG    |
| <i>AtPAP1</i>    | F: CCATCTCAATGCCCCACCA        |
| <i>AT1G56650</i> | R: TTCTGTTGTCGTCGCTTCAGG      |
| <i>AtPAP2</i>    | F: ATAGGTGGTCCTTGATTGCTGG     |
| <i>AT1G66390</i> | R: AGGATCGAGGTCGAGGCTTAA      |
| <i>AtTTG1</i>    | F: TTGGAACGATGTAGAGCCGAAAC    |
| <i>AT5G24520</i> | R: CAGGCTGAGGACTCTCGTAAATG    |
| <i>AtTT8</i>     | F: GCAACAGCATAAGCGGACG        |
| <i>AT4G09820</i> | R: CCTCTTACTTTTCGCCCTTATCTCC  |
| <i>AtEGL3</i>    | F: TTCAAGCGATTGCGTTTCCC       |
| <i>AT1G63650</i> | R: GATGATCGCTTCCACCTTGTGA     |
| <i>AtGL3</i>     | F: TTTGCTTCCCGTTCCTTGG        |
| <i>AT5G41315</i> | R: AGGCTCCGTACTGAACATAGGC     |
| <i>AtACTIN</i>   | F: CTGGAATGGTGAAGGCTGGTT      |
| <i>AT1G13320</i> | R: CGATTGGATACTTCAGAGTGAGGAT  |
| <i>CYP707A1</i>  | F: AGAGTCTCTAACTTGGGGAGAT     |
| <i>AT4G19230</i> | R: TGGATCAAATTTCCCCGGATTA     |
| <i>CYP707A2</i>  | F: ATTTAAATGGTGGTTGCACTGG     |
| <i>AT2G29090</i> | R: GCGAAGAAGGAATTGGGATTTT     |
| <i>CYP707A3</i>  | F: TGATATATTTTCGGATCCGGGG     |
| <i>AT5G45340</i> | R: TGATATATTTTCGGATCCGGGG     |

|                  |                            |
|------------------|----------------------------|
| <i>CYP707A4</i>  | F: TTTAGCTAACTCATTGCCTGGA  |
| <i>AT3G19270</i> | R: TGCCACTGACACATAAGGTTAT  |
| <i>AiPP2CA</i>   | F: GTTAATGGTGCTACTCGGAGTA  |
| <i>AT3G11410</i> | R: GTGATCTACGGAGAGAGGAATG  |
| <i>PYL1</i>      | F: GTGAGTGAAGATTTTCGAGATGC |
| <i>AT5G46790</i> | R: CGATCATCGTCCAACAGATCTA  |
| <i>PYL6</i>      | F: ACAAACACTTCGTGAAAAGCTG  |
| <i>AT2G40330</i> | R: TGTAGTTCATGAGTCTGTGGTC  |
| <i>SnRK2.2</i>   | F: TTAAAGAGGTGATTTTGACGCC  |
| <i>AT3G50500</i> | R: AATCCGCTCATAAAGTTCTCCA  |
| <i>SnRK2.4</i>   | F: AAGGGAACAAGAGAAAACATGC  |
| <i>AT1G10940</i> | R: GAGCTTCAGATCTCTATGGCAT  |
| <i>SnRK2.6</i>   | F: ATATCTCCTGAATGTCGCCATT  |
| <i>AT4G33950</i> | R: GTTCATTAGATCTGCCGGTAGA  |

|                     |                                                                                  |     |
|---------------------|----------------------------------------------------------------------------------|-----|
| ATAF1.seq           | MSEIQLLEGGFRFPTDEELVMHYLCRKAASQSIAPVIAEIDLKYPFWELG.....LA                        | 56  |
| ATAF2_AT5G08790.1_  | MKSEINLEGGFRFPTDEELVYFYLCRKAASEQLSAPVIAEIDLKYPFWELG.....MS                       | 56  |
| ATNAC019.seq        | MGIQETDPLTQLSLEGGFRFPTDEELVMQYLCRKAAGYDFSLQLIAEIDLKYPFWLEN.....KA                | 63  |
| ATNAC032.seq        | MMKSGAILQFPFGFRFPTDEELVMQYLCRKAASQIFPAPIETEDLNRYDPWDLB.....MA                    | 59  |
| ATNAC055.seq        | MGQLLDPLAQLSLEGGFRFPTDEELVMQYLCRKAAGHDFSLQLIAEIDLKYPFWVLS.....KA                 | 63  |
| AtRD26_AT4G27410.3_ | MGVREKDPPLAQLSLEGGFRFPTDEELVMQYLCRKAAGYDFSLQVIGDIDLKYPFWDLBSKQTCFFVGEYCNLYLGA    | 80  |
| BnNAC2.seq          | MSEIQLLEGGFRFPTDEELVMHYLCRKAASQSIAPVIAEIDLKYPFWELG.....LA                        | 55  |
| BoNAC019.seq        | MGIQETDPLAQLSLEGGFRFPTDEELVMQYLCRKAAGYDFSLQLIAEIDLKYPFWLEN.....KA                | 63  |
|                     |                                                                                  |     |
| ATAF1.seq           | IYGEKEWYFFSPDRDRKYPNGSRPNRAGSGYWKATGADREIIGLKKPV.GIKKALVFYAGKPEKCKTNWIMHEYRLADV  | 135 |
| ATAF2_AT5G08790.1_  | IYGEKEWYFFSPDRDRKYPNGSRPNRAGSGYWKATGADREIIGKPKTL.GIKKALVFYAGKPEKCKTNWIMHEYRLADV  | 135 |
| ATNAC019.seq        | IYGEKEWYFFSPDRDRKYPNGSRPNRAGSGYWKATGADREIISTEGQRVGIKRALVFYAGKPEKCKTNWIMHEYRLIEPS | 143 |
| ATNAC032.seq        | IYGEKEWYFFSPDRDRKYPNGSRPNRAGSGYWKATGADREIIGRPPKV.GIKKALVFYAGKPEKCKTNWIMHEYRLADV  | 138 |
| ATNAC055.seq        | IYGEKEWYFFSPDRDRKYPNGSRPNRAGSGYWKATGADREIISTEGRRVGIKRALVFYAGKPEKCKTNWIMHEYRLIEPS | 143 |
| AtRD26_AT4G27410.3_ | IYGEKEWYFFSPDRDRKYPNGSRPNRAGSGYWKATGADREIITADGRRVGIKRALVFYAGKPEKCKTNWIMHEYRLIEHS | 160 |
| BnNAC2.seq          | IYGEKEWYFFSPDRDRKYPNGSRPNRAGSGYWKATGADREIIGLKKPV.GIKKALVFYAGKPEKCKTNWIMHEYRLADV  | 134 |
| BoNAC019.seq        | IYGEKEWYFFSPDRDRKYPNGSRPNRAGSGYWKATGADREIISTEGQRVGIKRALVFYAGKPEKCKTNWIMHEYRLIEPS | 143 |
|                     |                                                                                  |     |
| ATAF1.seq           | RSV.RKRNLSLRDDWVLCRIYKKGATERRGPPPPVYVDEIM.EEKPKVIEMVMPFPQQTSEFAYFDTSDSVPKLHT     | 213 |
| ATAF2_AT5G08790.1_  | RSASVNRNNLSLRDDSS.....                                                           | 152 |
| ATNAC019.seq        | RRNGSTRLLDDWVLCRIYKQSSAQKQVYDNGIANAREFSNNG.....                                  | 185 |
| ATNAC032.seq        | RSVR.RKRNLSLRDDWVLCRIYKKGVIERRRSDIE.....DGLKPVTTDTCPPESVA                        | 188 |
| ATNAC055.seq        | RRNGSTRLLDDWVLCRIYKQTSAAKQAYNNLMTSGREYSNNG.....                                  | 185 |
| AtRD26_AT4G27410.3_ | RSHGSSFLDDWVLCRIYKKTSGSQKQAVTPVQACREHSTNG.....                                   | 202 |
| BnNAC2.seq          | RSAAARPKRNLSLRDDWVLCRIYKKGAIERKGGPPFPVYVGEVVEEKPRLESMGMPFPVPMDFVYDTSVDPKLHT      | 214 |
| BoNAC019.seq        | RANGSFLDDWVLCRIYKQSSAQKQAYEHVVTSTRLESNNG.....                                    | 185 |
|                     |                                                                                  |     |
| ATAF1.seq           | TDSSCS.EQVVSPEFTSEVQSEPKWKDWSAVSNDDNNTLDFG.....                                  | 254 |
| ATAF2_AT5G08790.1_  | ..SSGG.HGHVVSPEVLEVQSEPKWGELEDALEAF.DTSMFGS.....SMELI                            | 196 |
| ATNAC019.seq        | ..TSSTTSSSHFEDVLDLDFHQEIDNRNRFQSNP.NRISSLRPDLTEQ.KTGFHGLADTSNFDWASFAQNVHEHNSVPEL | 261 |
| ATNAC032.seq        | RLISGS.EQAVSPEFTCSNGRLS.....NALDFP.....                                          | 216 |
| ATNAC055.seq        | ..SSTS.SSSHQYDVLVLESLHEIDNRSLGFAAGSSNALPHSHRVLNHNKTFGQGLAREPFDWANLIGQ....NSVPEL  | 258 |
| AtRD26_AT4G27410.3_ | ..SSS.SSSQLDDVLDLDFPEIKD....QSFNL.FRMNSLRTLLNG.....NFDWASLAGL....NPIPEL          | 256 |
| BnNAC2.seq          | TESSCS.EQVVSPEFTSEVQSEPKWKDWSGAANDK.NSLDFG.....                                  | 254 |
| BoNAC019.seq        | ..TSSTTSSSHFEDVLDLDFHHETDNRNRFQYANSSNRFSLLRPDLTVGEKTFGFLADTSNFDWGSFVGNVHE.NSGPEL | 262 |
|                     |                                                                                  |     |
| ATAF1.seq           | ...FNYIDATVDNAFGGGSSNQMFPLQDMFMYM...KEY                                          | 289 |
| ATAF2_AT5G08790.1_  | QPDAFVFPQFLYQS...DYFTSFQDPPEKPFPLNWS..FAPQG                                      | 233 |
| ATNAC019.seq        | GMSHVVPNLEYNC...GYLKTEE...VESSHGF...NNSGELAQKGYGVDSFGYSGQV.GGFGFM                | 317 |
| ATNAC032.seq        | ...FNYVDAIAD...NEIVSRLLGGNQMWSTLLD..PLVVRQGT                                     | 253 |
| ATNAC055.seq        | GLSHNVFSIRYGD...GGTQQTEGIPRFNNSNDV...SA...NQGFSDVPVNGFGYSQQSSSGFGF               | 316 |
| AtRD26_AT4G27410.3_ | APTNGLEFSYGGYD...AFRAAEGE...AESGHVNRQNSGLTQSFYSSSGFGVSGQTFEFRQ                   | 314 |
| BnNAC2.seq          | ...FNYIDATAF...GGVGSNQLFPLQDMFMYM...PKFY                                         | 286 |
| BoNAC019.seq        | GLSHVVSLEFNS...GYLRMEE...FNNPDDF...GF...AQNSYGIDSVGFGYSG.QVGGFGY                 | 315 |

Fig. S1. Sequence analysis of BoNAC019. Amino acid alignment of BoNAC019 and other NAC family members from selected plant species, including AtNAC032 (GenBank accession no. NP\_177869.1), ATAF1 (GenBank accession NP\_171677.1), ATAF2 (GenBank accession: X74756.1), AtNA019 (GenBank accession: NM\_104167.6), AtNAC055 (GenBank accession: NM\_112418.4), AtRD26 (GenBank accession: NM\_118875.4) from *Arabidopsis*, BnNAC2 (GenBank accession no. NP\_001302866.1) from *Brassica napus*. The amino acid residues are exactly the same as the black shadow, the 75% is the same as the pink shadow, and the 50% is the same as the blue shadow. Alignments were performed using DNAMAN.

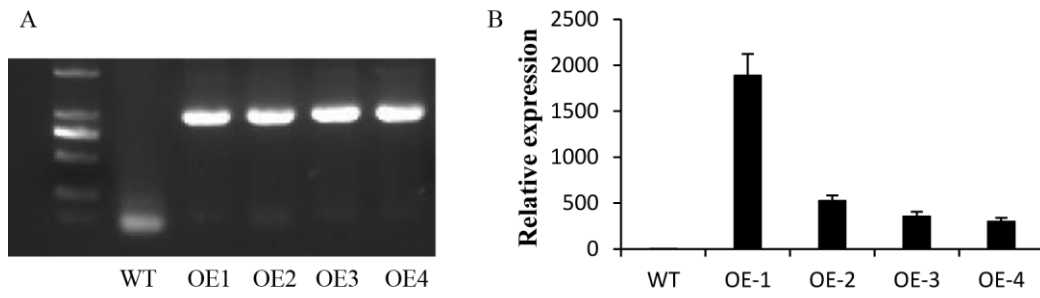

Fig. S2. PCR and qPCR analysis of transgenic Arabidopsis plants. A. PCR analysis of overexpressing transgenic Arabidopsis plants. B. qPCR analysis of overexpressing transgenic Arabidopsis plants. Error bars show the standard deviations for three independent replicates.

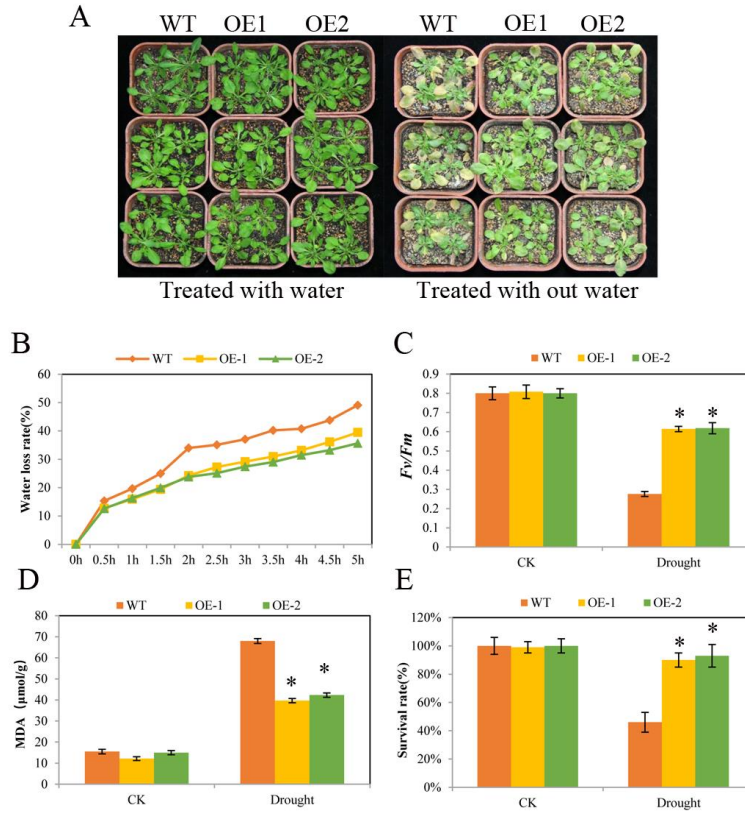

Fig. S3. Overexpression of AtNAC019 enhanced tolerance to drought stress. A. Phenotypes of WT and OE plants after water withholding for three weeks. B. Water loss rate. C.  $F_v/F_m$  ratios. D. MDA content. E. Survival rate of WT and OE plants after drought treatment. Seedlings treated with water were used as a mock control (CK). Error bars show the standard deviations for three independent replicates. Asterisks indicate statistically significant differences compared to WT at the same time point (\* $P < 0.05$ ).

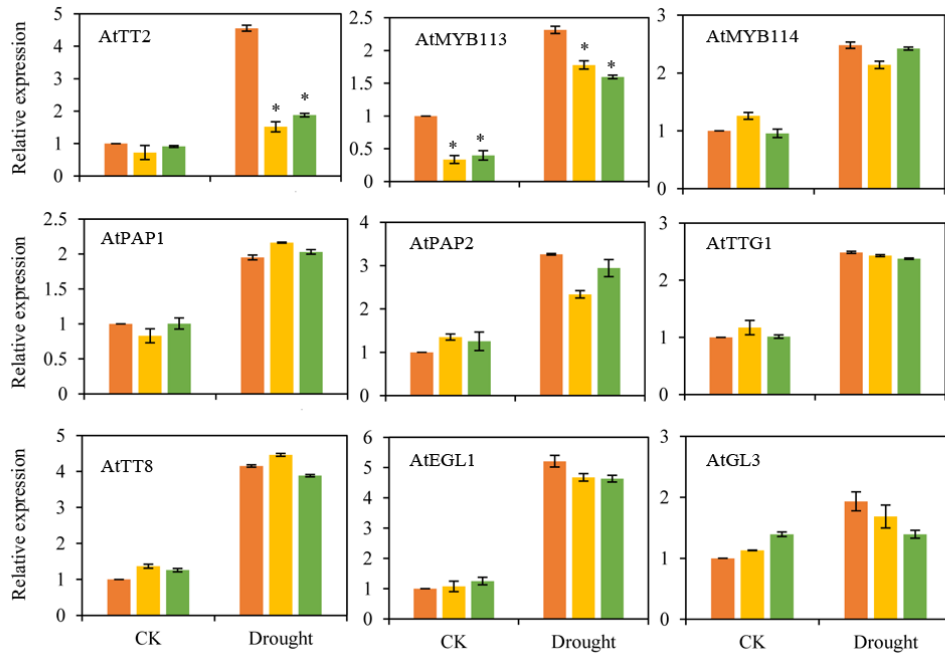

Fig. S4. Expression levels of transcription factors involved in anthocyanin biosynthesis of WT and OE plants. Cabbage seedlings on MS medium containing 0 mannitol were used as a mock control (CK). Error bars show the standard deviations for three independent replicates. Asterisks indicate statistically significant differences compared to WT at the same time point (\*P < 0.05).



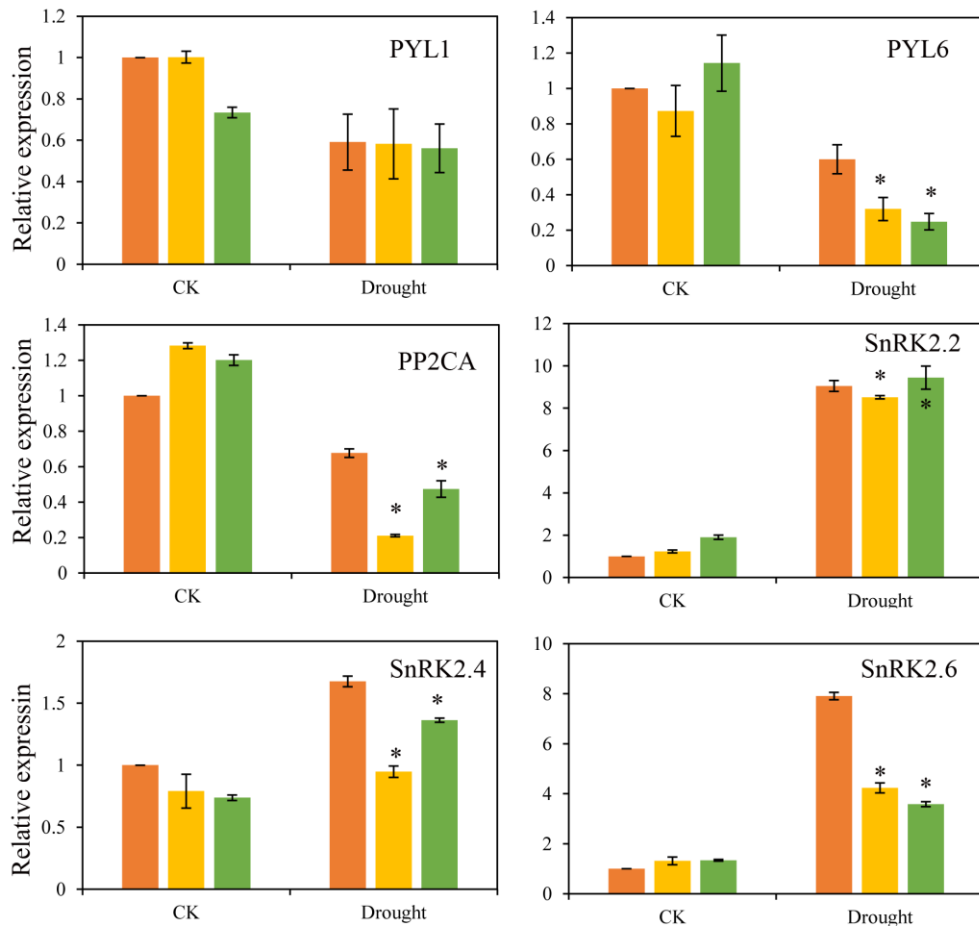

Fig. S5. Expression levels of ABA signaling genes of WT and OE plants. Cabbage seedlings treated without water were used as a mock control (CK). Error bars show the standard deviations for three independent replicates. Asterisks indicate statistically significant differences compared to WT at the same time point ( $*P < 0.05$ ).

|              |                                                                                     |     |
|--------------|-------------------------------------------------------------------------------------|-----|
| AtNAC019.seq | MGIQETDPIIQLSLPPGFRFYPTDEELMVQYLCRKAAGYDFSLQLIAEIDLYKFDPWVLPNKALFGEKEWYFFSPRDRKY    | 80  |
| BoNAC019.seq | MGIQETDPIIQLSLPPGFRFYPTDEELMVQYLCRKAAGYDFSLQLIAEIDLYKFDPWVLPNKALFGEKEWYFFSPRDRKY    | 80  |
| Consensus    | mgigetdpl qlslppgfrfyptdeelmvqylcrkaagydfslqliaeidlykfdpwvlpnkalfgekewyffsprdrky    |     |
| AtNAC019.seq | PNGSRPNRVAGSGYWKATGTDKIISTEGQRVGIKKALVFIYIGKAPKGTKTNWIMHEYRLI EFSRPNRNGSRKLDWVLCRIY | 160 |
| BoNAC019.seq | PNGSRPNRVAGSGYWKATGTDKIISTEGQRVGIKKALVFIYIGKAPKGTKTNWIMHEYRLI EFSRPNRNGSRKLDWVLCRIY | 160 |
| Consensus    | pngsrpnrvagsgywkatgtdkiiisteg rvgikkalvfiyigkapkgtktnwimheyrl epsr ngs klldwvlcriy  |     |
| AtNAC019.seq | KKQSSAQQCVYDNGIANRRETSNNGTSSTTSSSSHFEDVLDSEHCEIDNRRNFCFSNE.NRISSLRPDLTE.CRTGREGLA   | 238 |
| BoNAC019.seq | KKQSSAQQCVYDNGIANRRETSNNGTSSTTSSSSHFEDVLDSEHCEIDNRRNFCFSNE.NRISSLRPDLTE.CRTGREGLA   | 240 |
| Consensus    | kkqssaqqq y re snngtssttsssshfedvids h e dnrnfq n nr sslrpdlt ktgf gla              |     |
| AtNAC019.seq | DTNSFDWCSFVGNVEHNSVPELGLSHVVENLDFYNGGYLKEEPEVESHGANNNGELACKGYGV...SFGYSGQVGGGCF     | 316 |
| BoNAC019.seq | DTNSFDWCSFVGNVEHNSVPELGLSHVVESLDFNSGYLKEEPEVESHGANNNGELACKGYGV...SFGYSGQVGGGCF      | 315 |
| Consensus    | dt fdw sf gnvehn s pelg shvvp le n gyk eee f aq yg d fgysgqvvggfg                   |     |

Fig. S6. Sequence analysis of BoNAC019 and AtNAC019. The amino acid residues are exactly the same as the black shadow and the 50% is the same as the blue shadow Alignments were performed using DNAMAN.
